# Supplementary material
Source: publisher site journal article supplement (https://www.dovepress.com/article/342658)
Supplement: Supplementary file 1 [file get_supplementary_file.php]

Appendix Table 1. The criteria for degree of weight loss within 1 month in cancer patients.

| **Weight loss within 1 month** | **Grade** |
| --- | --- |
| 0%~1.9% of body weight | 0 |
| 2%~2.9% of body weight | 1 |
| 3%~4.9% of body weight | 2 |
| 5%~9.9% of body weight | 3 |
| ≥10% of body weight | 4 |

Appendix Table 2. The predictive accuracy of models constructed by different machine learning approaches.

|  | **Predictive Accuracy** | | | | | | | | |
| --- | --- | --- | --- | --- | --- | --- | --- | --- | --- |
| Linear SVM | Radial SVM | Logistic Regression | KNN | Decision Tree | Random Forest | Naïve Bayes | Neural Network | XGBoost |
| **Male** | 70.91% | 72.80% | 72.67% | 66.17% | 65.63% | 71.99% | 56.43% | 74.41% | 71.95% |
| **Female** | 70.20% | 70.92% | 69.77% | 66.05% | 63.18% | 71.78% | 62.61% | 73.41% | 73.65% |

Note: SVM, support vector machines; KNN, k-nearest neighbors; XGBoost, extreme gradient boosting.
